# Supplementary material for: Role of GSPT1 and GSPT2 polymorphisms in different outcomes upon Hepatitis B virus infection and prognosis to lamivudine therapy
Source: Oxford University Press journal article supplement (doi:10.1042/bsr20181668), 2019-03-01
Supplement: bsr-2018-1668_supp.pdf [file bsr-2018-1668_supp.pdf]

Supplementary Table 1 Hardy-Weinberg test of 2 SNPs in healthy and spontaneously recovered subjects

| SNP      | Genotype | ObsNum. | MAF   | $\chi^2$ | <i>P</i> |
|----------|----------|---------|-------|----------|----------|
| rs33635  | TT       | 323     | 0.385 | 0.020    | 0.889    |
|          | CT       | 401     |       |          |          |
|          | CC       | 127     |       |          |          |
| rs974285 | TT       | 711     | 0.079 | 184.355  | <0.001   |
|          | CT       | 61      |       |          |          |
|          | CC       | 33      |       |          |          |

Supplementary Table 2 Baseline clinical characteristics of viral response subjects

| characteristics                   | Chronic hepatitis B |                    | <i>P</i>     | OR(95%CI)                 |
|-----------------------------------|---------------------|--------------------|--------------|---------------------------|
|                                   | viral Response      | viral Non-response |              |                           |
| Age ( $\bar{x} \pm s$ )           | 50.86 ± 11.03       | 52.25 ± 10.75      | 0.273        |                           |
| Gender(Male/Female)               | 160/92              | 83/19              | 0.001        | 0.398(0.227,0.697)        |
| Smokers(Yes/No)                   | 81/171              | 48/54              | 0.008        | 0.533(0.333,0.853)        |
| Drinkers(Yes/No)                  | 105/147             | 55/47              | 0.036        | 0.610(0.384,0.970)        |
| <b>HbeAg(+/-)</b>                 | <b>129/123</b>      | <b>55/47</b>       | <b>0.641</b> | <b>0.896(0.565,1.421)</b> |
| HBV DNA (log pg/ml) , <i>M(Q)</i> | 7.67 (0.47)         | 7.69 (0.44)        | 0.345        |                           |
| ALT (IU/L) , <i>M(Q)</i>          | 279.50 (188.00)     | 317.50 (220.00)    | 0.096        |                           |
| AST (IU/L) , <i>M(Q)</i>          | 357.50 (272.00)     | 326.00 (230.00)    | 0.614        |                           |

Supplementary Table 3 Baseline clinical characteristics of biochemical response subjects

| characteristics                   | Chronic hepatitis B  |                          | <i>P</i>     | OR(95%CI)                 |
|-----------------------------------|----------------------|--------------------------|--------------|---------------------------|
|                                   | Biochemical Response | Biochemical Non-response |              |                           |
| Age ( $\bar{x} \pm s$ )           | 52.36 ± 10.83        | 50.09 ± 10.98            | 0.051        |                           |
| Gender(Male/Female)               | 111/72               | 132/39                   | 0.001        | 0.455(0.286,0.725)        |
| Smokers(Yes/No)                   | 54/129               | 75/96                    | 0.005        | 0.536(0.346,0.831)        |
| Drinkers(Yes/No)                  | 70/113               | 90/81                    | 0.007        | 0.558(0.365,0.851)        |
| <b>HbeAg(+/-)</b>                 | <b>78/105</b>        | <b>80/91</b>             | <b>0.431</b> | <b>0.845(0.556,1.286)</b> |
| HBV DNA (log pg/ml) , <i>M(Q)</i> | 7.66 (0.55)          | 7.69 (0.48)              | 0.438        |                           |

---

|                          |                 |                 |       |
|--------------------------|-----------------|-----------------|-------|
| ALT (IU/L) , <i>M(Q)</i> | 279.00 (174.00) | 306.00 (223.00) | 0.186 |
| AST (IU/L) , <i>M(Q)</i> | 331.00 (278.00) | 361.50 (239.00) | 0.796 |

---
